# Supplementary material for: Hierarchical Au–CuO nanocomposite from redox transformation reaction for surface enhanced Raman scattering and clock reaction
Source: Royal Society of Chemistry journal article supplement (doi:10.1039/c3ce41766b), 2013-10-30
Supplement: c3ce41766b.pdf [file c3ce41766b.pdf]

## Electronic supplementary information (ESI)

# Hierarchical Au-CuO Nanocomposite from Redox Transformation Reaction for Surface Enhanced Raman Scattering and Clock Reaction

Jaya Pal,<sup>a</sup> Mainak Ganguly,<sup>a</sup> Soumen Dutta,<sup>a</sup> Chanchal Mondal,<sup>a</sup> Yuichi Negishi<sup>b</sup> and  
Tarasankar Pal<sup>a\*</sup>

<sup>a</sup>Department of Chemistry, Indian Institute of Technology, Kharagpur-721302, India

<sup>b</sup>Department of Applied Chemistry, Tokyo University of Science, Tokyo 1628601, Japan

E-mail: [tpal@chem.iitkgp.ernet.in](mailto:tpal@chem.iitkgp.ernet.in)

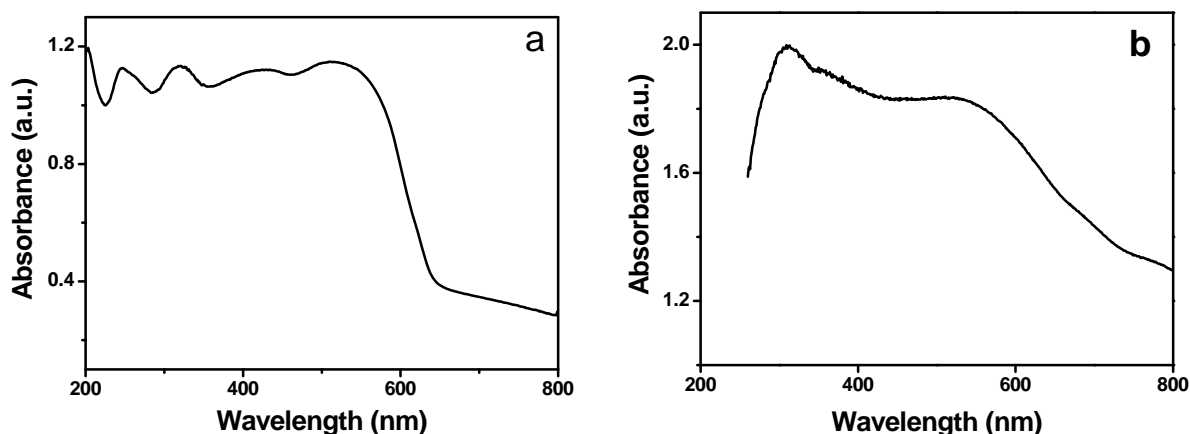

Figure S1. DRS spectra of (a) as-prepared Cu<sub>2</sub>O sphere and (b) Au-CuO nanocomposite.

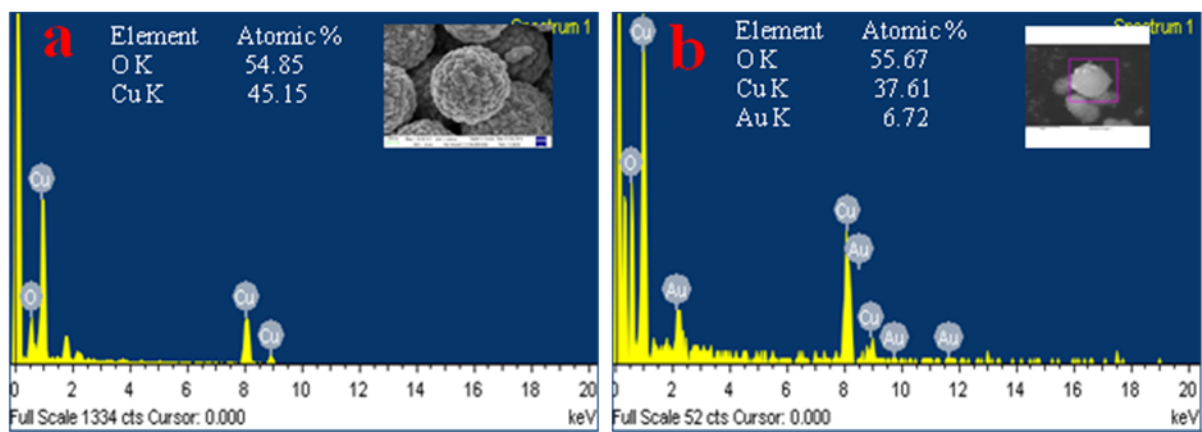

Figure S2. EDX analysis of (a) as-prepared  $\text{Cu}_2\text{O}$  sphere and (b) Au-CuO nanocomposite.

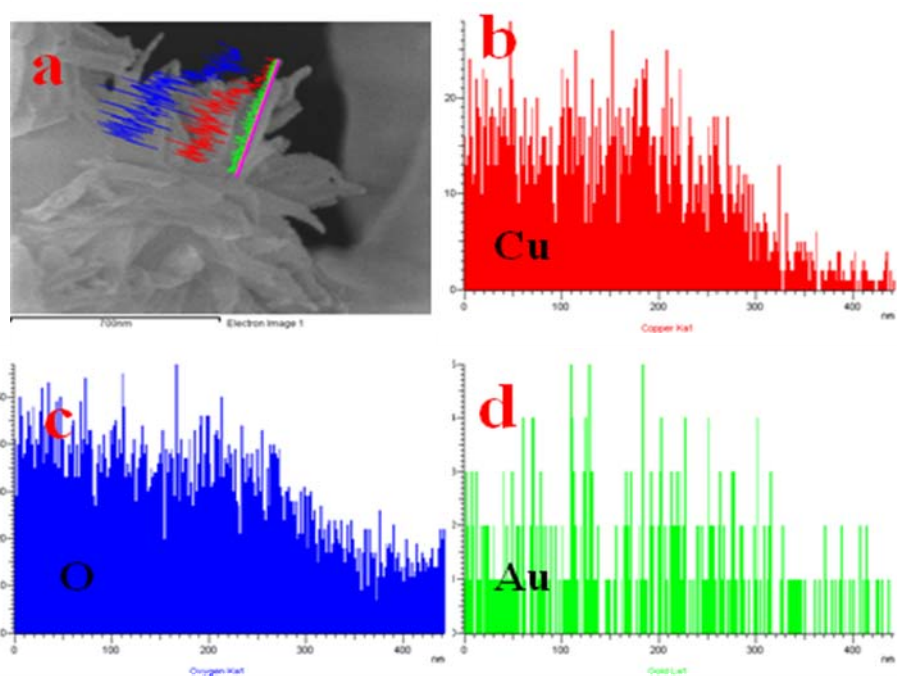

Figure S3. Line mapping of a single tip of Au-CuO nanoflower (a) for the element Cu(b), O(c) and Au(d).

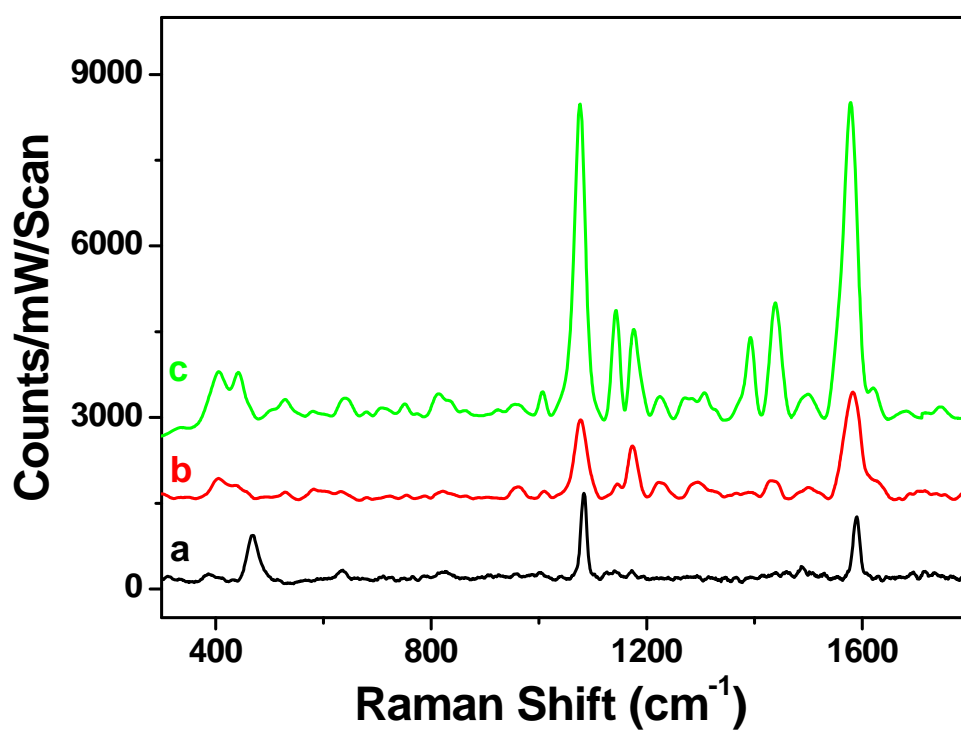

Figure S4. SERS spectra of (b)  $10^{-5}$  M  $\text{Cu}_2\text{O}$  nanoparticle, (c)  $10^{-5}$  M Au NP and (a) NRS spectrum of 4-ATP (0.1 M).

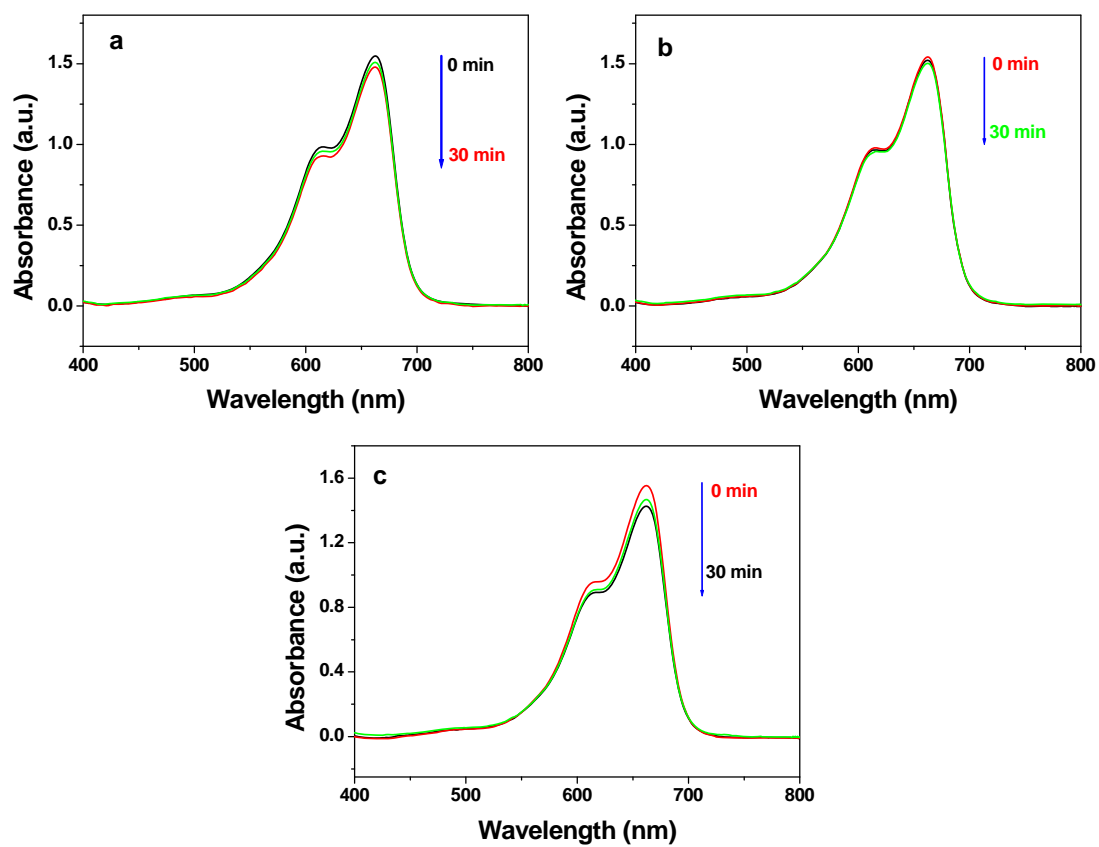

Figure S5. Comparative study of change of absorption spectra of MB by using various reducing agents e.g. (a) hydrazine hydrate, (b) glucose and (c) NaBH<sub>4</sub>.

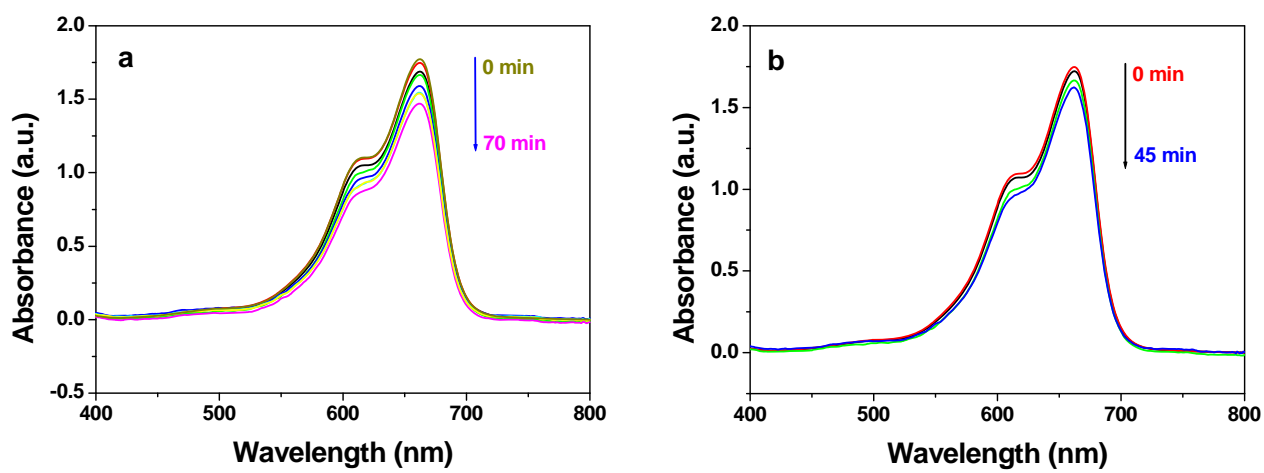

Figure S6. Comparative study of clock reaction of MB by using (a) CuO and Cu(0).

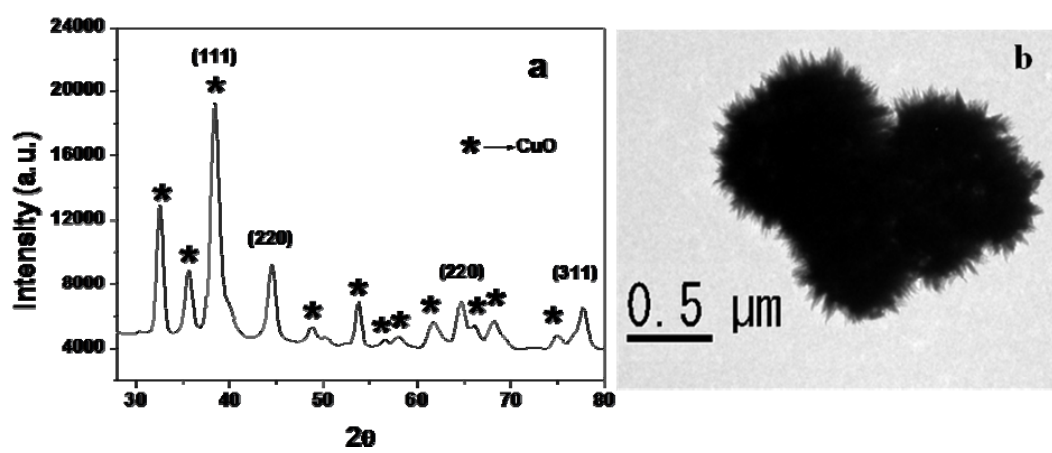

Figure S7. (a) XRD pattern and (b) TEM image of Au-CuO nanocomposite after the catalytic cycle.
